# Supplementary material for: Sock and Environmental Swabs as an Efficient, Non-Invasive Tool to Assess the Salmonella Status of Sow Farms
Source: MDPI journal article supplement (doi:10.3390/ani13061031), 2023-03-11
Supplement: s1 [file s1]

| farm    | farm size | Herd type | date of sampling | no. samples taken | no. / (%) positive samples | farm status | serovars farrowing | other serovars farrowing | serovars nursery | other serovars nursery | serovars other areas | other serovars other areas |
|---------|-----------|-----------|------------------|-------------------|----------------------------|-------------|--------------------|--------------------------|------------------|------------------------|----------------------|----------------------------|
| Salm1   | 1000      | f-f       | 07.06.2016       | 8                 | 1 / (12.5)                 | pos         | n.d.               | /                        | STM              | /                      | n.d.                 | /                          |
| Salm2   | 2000      | f-n       | 18.07.2016       | 23                | 5 / (21.7)                 | pos         | SD                 | /                        | STM, others      | SGC                    | others               | SGC                        |
| Salm3   | 3000      | f-f       | 27.06.2016       | 28                | 4 / (14.3)                 | pos         | n.d.               | /                        | STM, others      | SGC                    | others               | SGC, n.t.                  |
| Salm4   | 1200      | f         | 13.11.2017       | 24                | 18 / (75.0)                | pos         | others             | SGC, SGE                 | n.d.             | /                      | SD, others           | SGC, SGE                   |
| Salm5   | 300       | f-f       | 08.12.2017       | 15                | 0 / (0.0)                  | neg         | n.d.               | /                        | n.d.             | /                      | n.d.                 | /                          |
| Salm6   | 5000      | f-n       | 24.12.2015       | 40                | 11 / (27.5)                | pos         | STM                | /                        | STM              | /                      | STM                  | /                          |
| Salm7   | 400       | f-f       | 23.10.2015       | 16                | 9 / (57.1)                 | pos         | others             | SGC                      | others           | SGC                    | STM                  | /                          |
| Salm8   | 6000      | f-f       | 05.04.2016       | 31                | 13 / (41.9)                | pos         | STM, SD, others    | SGC                      | STM, others      | SGC                    | STM                  | /                          |
| Salm9   | 2800      | f-f       | 18.05.2016       | 29                | 10 / (35.4)                | pos         | n.d.               | /                        | STM, SD          | /                      | STM, SD              | /                          |
| Salm10  | 1200      | f-n       | 19.10.2016       | 40                | 14 / (35.5)                | pos         | n.d.               | /                        | STM              | /                      | SD                   | /                          |
| Salm11  | 2000      | f-n       | 14.03.2018       | 29                | 10 / (34.4)                | pos         | n.d.               | /                        | STM              | /                      | SD                   | /                          |
| Salm12  | 300       | f-n       | 05.04.2017       | 32                | 6 / (18.8)                 | pos         | n.d.               | /                        | STM              | /                      | n.d.                 | /                          |
| Salm13  | 300       | f-f       | 17.05.2018       | 13                | 7 / (53.8)                 | pos         | STM                | /                        | STM              | /                      | STM                  | /                          |
| Salm14  | 350       | f-n       | 24.02.2017       | 21                | 3 / (14.3)                 | pos         | n.d.               | /                        | STM              | /                      | n.d.                 | /                          |
| Salm15  | 1200      | f-n       | 03.08.2017       | 24                | 8 / (33.3)                 | pos         | others             | SGE                      | n.d.             | /                      | others               | SCE                        |
| Salm16  | 130       | f-n       | 24.07.2017       | 18                | 4 / (22.2)                 | pos         | n.d.               | /                        | STM              | /                      | STM                  | /                          |
| Salm17  | 700       | f-n       | 13.07.2017       | 40                | 29 / (72.5)                | pos         | others             | SGE, n.t.                | STM, others      | SGE                    | SD, others           | SGE                        |
| Salm18  | 300       | f-f       | 05.03.2018       | 28                | 1 / (3.7)                  | pos         | n.d.               | /                        | STM              | /                      | n.d.                 | /                          |
| Salm19  | 300       | f-n       | 03.07.2018       | 26                | 14 / (53.8)                | pos         | STM, others        | SGC                      | STM, others      | SGC                    | STM                  | /                          |
| Salm20  | 250       | f-n       | 01.08.2016       | 18                | 15 / (83.3)                | pos         | others             | SGB, SGE                 | STM, SD          | /                      | STM, others          | SGB, SGE                   |
| Salm21  | 300       | f-n       | 19.05.2016       | 14                | 5 / (35.7)                 | pos         | others             | n.t.                     | STM, SD          | /                      | SD, others           | n.t.                       |
| Salm22  | 150       | f-f       | 05.09.2017       | 15                | 2 / (13.3)                 | pos         | n.d.               | /                        | n.d.             | /                      | STM                  | /                          |
| Salm23  | 150       | f-n       | 26.04.2019       | 16                | 5 / (31.3)                 | pos         | n.d.               | /                        | STM              | /                      | n.d.                 | /                          |
| Salm24  | 400       | f-n       | 03.11.2015       | 14                | 2 / (14.3)                 | pos         | n.d.               | /                        | STM              | /                      | n.d.                 | /                          |
| Salm25  | 1200      | f-n       | 09.05.2016       | 18                | 3 / (16.6)                 | pos         | n.d.               | /                        | STM              | /                      | n.d.                 | /                          |
| Salm26  | 120       | f-f       | 05.10.2017       | 24                | 11 / (45.8)                | pos         | STM                | /                        | STM              | /                      | STM                  | /                          |
| Salm27  | 1500      | f-n       | 04.07.2016       | 28                | 10 / (35.7)                | pos         | SD, others         | SGE                      | others           | SGE                    | others               | SGE                        |
| Salm28  | 800       | f-n       | 15.07.2021       | 22                | 3 / (13.63)                | pos         | n.d.               | /                        | others           | SGC                    | STM, others          | SGC                        |
| Salm29  | 300       | f-n       | 19.10.2017       | 34                | 21 / (61.8)                | pos         | SD                 | /                        | STM              | /                      | SD                   | /                          |
| Salm30  | 260       | f-n       | 21.06.2017       | 34                | 7 / (20.6)                 | pos         | STM                | /                        | STM              | /                      | STM                  | /                          |
| Salm31  | 600       | f-n       | 22.11.2018       | 19                | 5 / (26.3)                 | pos         | n.d.               | /                        | STM              | /                      | STM                  | /                          |
| Salm32  | 350       | f-n       | 16.12.2015       | 9                 | 3 / (33.3)                 | pos         | n.d.               | /                        | STM              | /                      | STM                  | /                          |
| Salm33  | 540       | f-f       | 02.06.2017       | 19                | 10 / (52.6)                | pos         | STM                | /                        | STM, others      | SGB                    | STM                  | /                          |
| Salm34  | 650       | f-n       | 01.08.2016       | 18                | 14 / (77.7)                | pos         | STM                | /                        | STM              | /                      | STM                  | /                          |
| Salm35  | 300       | f-f       | 12.12.2016       | 14                | 0 / (0)                    | neg         | n.d.               | /                        | n.d.             | /                      | n.d.                 | /                          |
| Salm36  | 200       | f-n       | 01.08.2016       | 18                | 11 / (61.1)                | pos         | n.d.               | /                        | STM              | /                      | STM                  | /                          |
| Salm37  | 200       | f-n       | 30.05.2017       | 11                | 7 / (63.6)                 | pos         | STM                | /                        | STM              | /                      | STM                  | /                          |
| Salm38  | 560       | f-n       | 04.04.2018       | 19                | 6 / (31.6)                 | pos         | SD                 | /                        | n.d.             | /                      | SD                   | /                          |
| Salm39  | 130       | f-f       | 19.12.2016       | 12                | 3 / (25.0)                 | pos         | n.d.               | /                        | n.d.             | /                      | others               | n.t.                       |
| Salm40  | n.i.      | f-f       | 23.05.2018       | 27                | 4 / (14.8)                 | pos         | n.d.               | /                        | STM              | /                      | STM                  | /                          |
| Salm41  | 600       | f-n       | 07.06.2016       | 25                | 17 / (68.0)                | pos         | n.d.               | /                        | STM              | /                      | STM                  | /                          |
| Salm42  | 120       | f-n       | 04.04.2016       | 16                | 7 / (43.7)                 | pos         | n.d.               | /                        | STM              | /                      | STM                  | /                          |
| Salm43  | 300       | f-n       | 08.12.2016       | 30                | 3 / (10.0)                 | pos         | n.d.               | /                        | STM              | /                      | n.d.                 | /                          |
| Salm44  | 180       | f-f       | 22.02.2017       | 23                | 1 / (4.3)                  | pos         | n.d.               | /                        | STM              | /                      | n.d.                 | /                          |
| Salm45  | 160       | f-f       | 30.07.2019       | 22                | 2 / (9.1)                  | pos         | n.d.               | /                        | SE               | /                      | SE                   | /                          |
| Salm46  | 200       | f-f       | 15.02.2018       | 10                | 1 / (10.0)                 | pos         | n.d.               | /                        | n.d.             | /                      | others               | SE                         |
| Salm47  | 1600      | f-n       | 27.02.2019       | 26                | 18 / (69.2)                | pos         | others             | n.t.                     | STM, others      | n.t.                   | others               | n.t.                       |
| Salm48  | 450       | f-n       | 29.11.2017       | 17                | 11 / (64.7)                | pos         | STM                | /                        | STM              | /                      | STM                  | /                          |
| Salm49  | 250       | f-n       | 09.11.2018       | 23                | 6 / (26.1)                 | pos         | n.d.               | /                        | STM, SE          | /                      | STM, SE              | /                          |
| Salm50  | 230       | f-n       | 22.11.2018       | 19                | 1 / (5.3)                  | pos         | n.d.               | /                        | n.d.             | /                      | STM                  | /                          |
| Salm51  | 300       | f-n       | 02.05.2017       | 32                | 2 / (6.3)                  | pos         | n.d.               | /                        | STM              | /                      | n.d.                 | /                          |
| Salm52  | 1000      | f-n       | 31.01.2017       | 50                | 19 / (38.0)                | pos         | others             | SGC                      | STM, others      | SGC                    | SD, others           | SGC                        |
| Salm53  | 350       | f-n       | 15.06.2020       | 24                | 10 / (41.6)                | pos         | STM, others        | SGC                      | STM              | /                      | n.d.                 | /                          |
| Salm54  | 130       | f-f       | 23.05.2017       | 18                | 5 / (27.7)                 | pos         | n.d.               | /                        | n.d.             | /                      | STM, others          | SCE                        |
| Salm55  | 220       | f-f       | 05.07.2017       | 15                | 4 / (26.6)                 | pos         | n.d.               | /                        | STM              | /                      | STM                  | /                          |
| Salm56  | 150       | f-n       | 22.05.2018       | 17                | 5 / (29.4)                 | pos         | n.d.               | /                        | STM              | /                      | STM                  | /                          |
| Salm57  | 200       | f-n       | 07.02.2018       | 19                | 0 / (0.0)                  | neg         | n.d.               | /                        | n.d.             | /                      | n.d.                 | /                          |
| Salm58  | 400       | f-n       | 19.01.2017       | 28                | 3 / (10.7)                 | pos         | n.d.               | /                        | STM              | /                      | STM                  | /                          |
| Salm59  | 350       | f-n       | 13.04.2016       | 22                | 13 / (59.1)                | pos         | n.d.               | /                        | STM              | /                      | STM                  | /                          |
| Salm60  | 120       | f-f       | 27.03.2015       | 11                | 6 / (54.5)                 | pos         | n.d.               | /                        | STM              | /                      | STM                  | /                          |
| Salm61  | 300       | f-n       | 01.02.2016       | 22                | 4 / (18.2)                 | pos         | SD                 | /                        | STM              | /                      | STM                  | /                          |
| Salm62  | 800       | f-n       | 01.12.2015       | 10                | 7 / (70.0)                 | pos         | others             | n.t.                     | others           | n.t.                   | others               | n.t.                       |
| Salm63  | 300       | f-n       | 25.11.2015       | 31                | 4 / (12.9)                 | pos         | n.d.               | /                        | n.d.             | /                      | STM, others          | SGC                        |
| Salm64  | 580       | f         | 30.03.2016       | 8                 | 0 / (0.0)                  | neg         | n.d.               | /                        | n.d.             | /                      | n.d.                 | /                          |
| Salm65  | 480       | f-n       | 30.03.2016       | 10                | 2 / (20.0)                 | pos         | others             | SGE                      | n.d.             | /                      | n.d.                 | /                          |
| Salm66  | 2000      | f-f       | 20.01.2016       | 39                | 9 / (23.1)                 | pos         | n.d.               | /                        | STM              | /                      | STM                  | /                          |
| Salm67  | 150       | f-n       | 06.06.2016       | 16                | 1 / (6.3)                  | pos         | n.d.               | /                        | n.d.             | /                      | SE                   | /                          |
| Salm68  | 300       | f-f       | 28.06.2017       | 23                | 7 / (30.4)                 | pos         | n.d.               | /                        | SE               | /                      | SE                   | /                          |
| Salm69  | 400       | f-f       | 09.02.2017       | 20                | 2 / (10.5)                 | pos         | SD                 | /                        | SD               | /                      | n.d.                 | /                          |
| Salm70  | 1500      | f-n       | 13.06.2018       | 28                | 15 / (53.6)                | pos         | STM, others        | SGC                      | STM, others      | SGC                    | others               | n.t.                       |
| Salm71  | n.i.      | f-n       | 24.09.2018       | 22                | 7 / (31.8)                 | pos         | others             | n.t.                     | STM              | /                      | SD                   | /                          |
| Salm72  | 100       | f-f       | 22.05.2017       | 17                | 11 / (64.7)                | pos         | STM                | /                        | STM              | /                      | n.d.                 | /                          |
| Salm73  | 350       | f-n       | 08.05.2017       | 20                | 5 / (25.0)                 | pos         | n.d.               | /                        | STM              | /                      | STM                  | /                          |
| Salm74  | 400       | f-n       | 06.11.2015       | 22                | 5 / (22.7)                 | pos         | n.d.               | /                        | STM              | /                      | others               | SGE                        |
| Salm75  | 80        | f-f       | 25.02.2016       | 13                | 1 / (7.7)                  | pos         | n.d.               | /                        | STM              | /                      | n.d.                 | /                          |
| Salm76  | 300       | f-n       | 10.12.2015       | 15                | 0 / (0.0)                  | neg         | n.d.               | /                        | n.d.             | /                      | n.d.                 | /                          |
| Salm77  | 100       | f-f       | 23.02.2017       | 15                | 5 / (33.3)                 | pos         | n.d.               | /                        | STM              | /                      | n.d.                 | /                          |
| Salm78  | 220       | f-n       | 27.11.2015       | 11                | 6 / (54.5)                 | pos         | SD                 | /                        | SD, SE           | /                      | SD                   | /                          |
| Salm79  | 2500      | f-n       | 07.07.2021       | 20                | 1 / (5.0)                  | pos         | n.d.               | /                        | n.d.             | /                      | SD                   | /                          |
| Salm80  | 220       | f-n       | 14.12.2017       | 20                | 7 / (35.0)                 | pos         | n.d.               | /                        | STM              | /                      | STM                  | /                          |
| Salm81  | 150       | f-n       | 21.10.2016       | 20                | 5 / (25.0)                 | pos         | n.d.               | /                        | STM              | /                      | n.d.                 | /                          |
| Salm82  | 100       | f-f       | 19.07.2017       | 25                | 7 / (28.0)                 | pos         | n.d.               | /                        | others           | SGE                    | others               | SGE                        |
| Salm83  | n.i.      | f-n       | 06.04.2016       | 26                | 12 / (46.2)                | pos         | STM                | /                        | STM              | /                      | n.d.                 | /                          |
| Salm84  | 280       | f-n       | 19.02.2016       | 15                | 10 / (66.7)                | pos         | STM                | /                        | STM              | /                      | STM                  | /                          |
| Salm85  | 100       | f-f       | 11.01.2016       | 21                | 0 / (0.0)                  | neg         | n.d.               | /                        | n.d.             | /                      | n.d.                 | /                          |
| Salm86  | 200       | f-n       | 28.02.2018       | 15                | 6 / (40.0)                 | pos         | n.d.               | /                        | STM              | /                      | STM                  | /                          |
| Salm87  | 120       | f-n       | 21.03.2017       | 32                | 13 / (40.6)                | pos         | n.d.               | /                        | STM              | /                      | STM                  | /                          |
| Salm88  | 400       | f-n       | 18.06.2019       | 28                | 15 / (53.6)                | pos         | n.d.               | /                        | STM              | /                      | STM, others          | n.t.                       |
| Salm89  | 350       | f-n       | 13.04.2016       | 28                | 14 / (50.0)                | pos         | STM                | /                        | STM              | /                      | STM                  | /                          |
| Salm90  | 360       | f-n       | 15.06.2018       | 26                | 3 / (11.5)                 | pos         | n.d.               | /                        | STM              | /                      | n.d.                 | /                          |
| Salm91  | 1000      | f-f       | 15.11.2017       | 22                | 2 / (9.1)                  | pos         | n.d.               | /                        | STM              | /                      | n.d.                 | /                          |
| Salm92  | 3000      | f-n       | 26.03.2019       | 19                | 8 / (42.1)                 | pos         | others             | SGC                      | STM, others      | SGC                    | n.d.                 | /                          |
| Salm93  | 160       | f-f       | 15.06.2018       | 10                | 2 / (20.0)                 | pos         | n.d.               | /                        | STM              | /                      | n.d.                 | /                          |
| Salm94  | 230       | f-n       | 04.07.2017       | 28                | 22 / (78.6)                | pos         | STM                | /                        | STM              | /                      | STM                  | /                          |
| Salm95  | 200       | f-f       | 28.02.2016       | 14                | 8 / (57.1)                 | pos         | SE                 | /                        | SE               | /                      | SE                   | /                          |
| Salm96  | 250       | f-n       | 21.12.2017       | 25                | 3 / (12.0)                 | pos         | STM                | /                        | n.d.             | /                      | STM                  | /                          |
| Salm97  | 500       | f-n       | 16.04.2018       | 21                | 0 / (0.0)                  | neg         | n.d.               | /                        | n.d.             | /                      | n.d.                 | /                          |
| Salm98  | 650       | f-n       | 20.09.2017       | 34                | 6 / (17.6)                 | pos         | n.d.               | /                        | STM, SD          | /                      | SD                   | /                          |
| Salm99  | 1000      | f-n       | 07.04.2017       | 46                | 22 / (47.8)                | pos         | SD, others         | SGC, n.t.                | SD, others       | n.t.                   | SD, others           | n.t.                       |
| Salm100 | 10000     | f-n       | 28.02.2016       | 32                | 12 / (37.5)                | pos         | n.d.               | /                        | STM              | /                      | STM, SD              | /                          |
| Salm101 | 50        | f-f       | 27.02.2015       | 11                | 0 / (0.0)                  | neg         | n.d.               | /                        | n.d.             | /                      | n.d.                 | /                          |
| Salm102 | 350       | f-n       | 26.07.2017       | 19                | 2 / (10.5)                 | pos         | n.d.               | /                        | STM              | /                      | n.d.                 | /                          |
| Salm103 | 500       | f-n       | 18.02.2019       | 29                | 16 / (55.2)                | pos         | n.d.               | /                        | STM, others      | SGB                    | STM, SD              | /                          |
| Salm104 | 10000     | f-n       | 26.01.2015       | 46                | 21 / (45.7)                | pos         | STM, SD            | /                        | STM              | /                      | STM                  | /                          |
| Salm105 | 5000      | f-n       | 16.12.2015       | 55                | 36 / (65.5)                | pos         | STM                | /                        | STM              | /                      | STM                  | /                          |

Table S1:

Individual results of *Salmonella* serovars detected on each farm within each area including information about farm size, type of farm, no. of samples and date of sampling  
 (STM= *Salmonella* Typhimurium, SD= *Salmonella* Derby, SE= *Salmonella* Enteritidis, SGB= *Salmonella* Group B (without STM), SGC= *Salmonella* Group C, SGE= *Salmonella* Group E, n.t.=no typing, n.d.= no detection)  
 (n.i.= no information, f=farrowing farm, f-n= farrowing farm with nursery, f-f= farrow-finish)
